# Supplementary material for: Tree rings reflect growth adjustments and enhanced synchrony among sites in Iberian stone pine (Pinus pinea L.) under climate change
Source: Springer Nature journal article supplement (doi:10.1007/s13595-015-0521-6), 2015-09-25

**Online resource 1.** Distribution of *Pinus pinea* (left, from EUFORGEN 2009 [[www.euforgen.org](http://www.euforgen.org)]), and location of study sites (right). Blue triangles indicate meteorological stations, red dots indicate newly established chronologies, and black dots indicate chronologies from the International Tree Ring Data Base (see Table 1 and text for details).

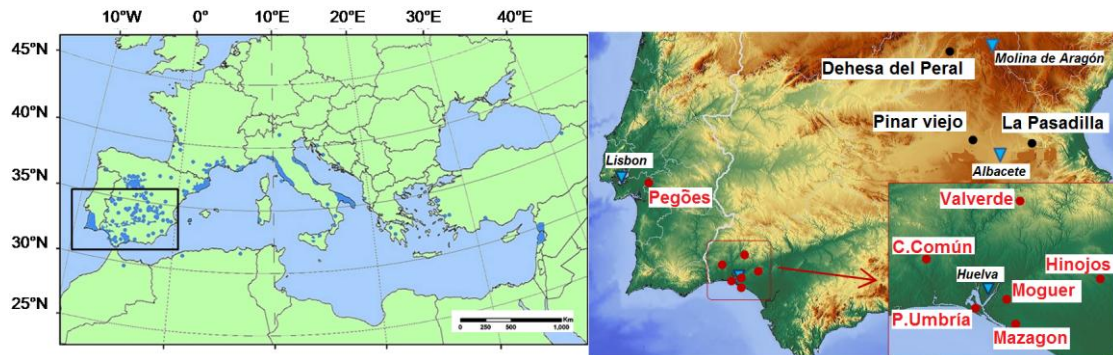

Supplement: MOESM1 [file 13595_2015_521_MOESM1_ESM.pdf]
