# Supplementary material for: Tree rings reflect growth adjustments and enhanced synchrony among sites in Iberian stone pine (Pinus pinea L.) under climate change
Source: Springer Nature journal article supplement (doi:10.1007/s13595-015-0521-6), 2015-09-25

**Online resource 2.** Climatic diagrams of the meteorological stations of Huelva (SW Spain), Lisbon (C Portugal), Albacete, and Molina de Aragón (CE Spain) (grey solid lines: precipitation; black dotted lines: mean temperature).

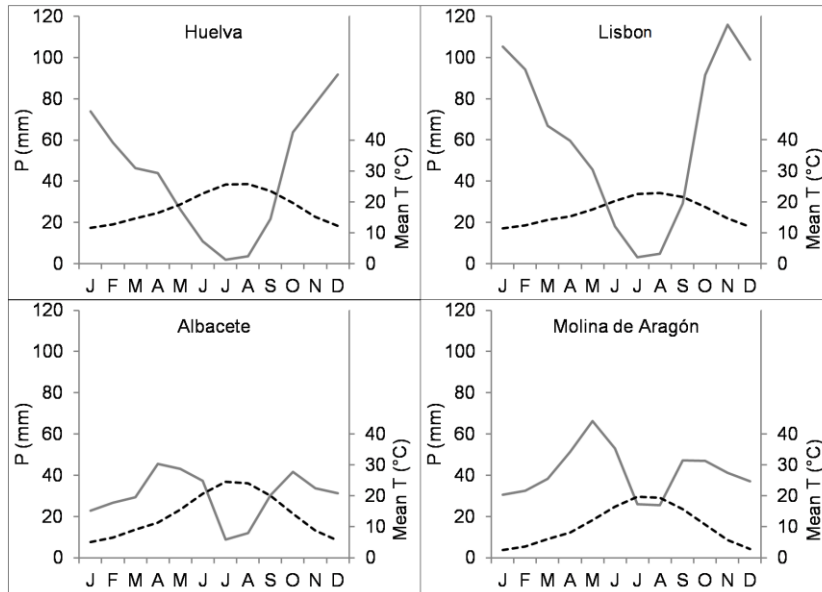

Supplement: MOESM2 [file 13595_2015_521_MOESM2_ESM.pdf]
