# Supplementary material for: Tree rings reflect growth adjustments and enhanced synchrony among sites in Iberian stone pine (Pinus pinea L.) under climate change
Source: Springer Nature journal article supplement (doi:10.1007/s13595-015-0521-6), 2015-09-25

**Online resource 3.** Percentage of variance accounted by the first PC with 30-year running window PCA of the chronologies of young and old trees from Huelva (left) and chronologies from La Mancha (right). The  $x$  axis shows the 30-yr intervals.

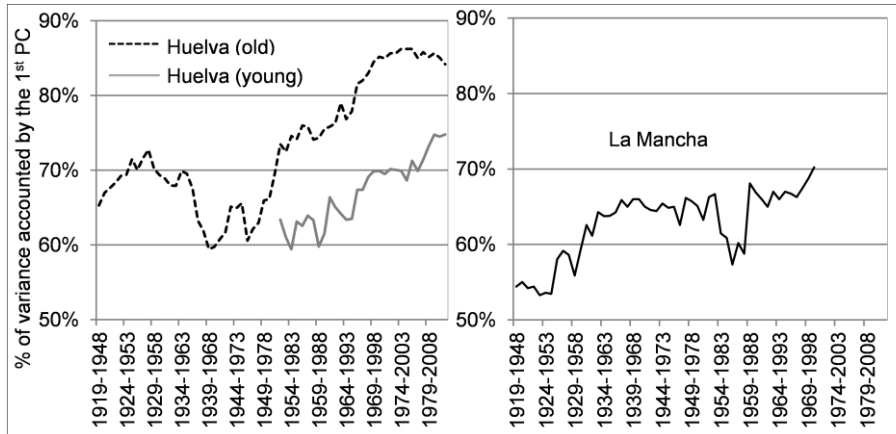

Supplement: MOESM3 [file 13595_2015_521_MOESM3_ESM.pdf]
