# Supplementary material for: Tree rings reflect growth adjustments and enhanced synchrony among sites in Iberian stone pine (Pinus pinea L.) under climate change
Source: Springer Nature journal article supplement (doi:10.1007/s13595-015-0521-6), 2015-09-25

**Online resource 4.** 30-year running mean sensitivity (Ms) of the chronologies of young trees from Huelva (top left), old trees from Huelva (top right), trees from Pegões (bottom left), and trees La Mancha (bottom right). The x axis shows the 30-yr intervals.

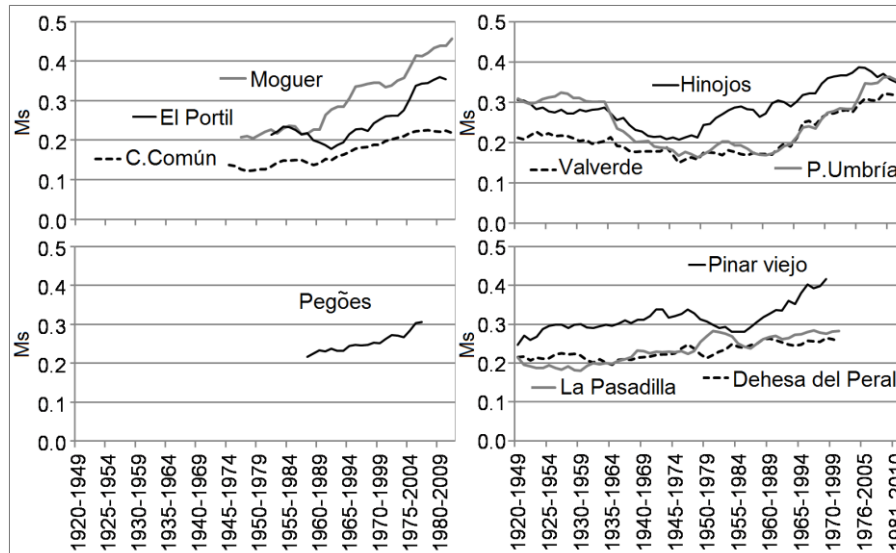

Supplement: MOESM4 [file 13595_2015_521_MOESM4_ESM.pdf]
